# Supplementary material for: Silicon/graphite composite anode with constrained swelling and a stable solid electrolyte interphase enabled by spent graphite
Source: Royal Society of Chemistry journal article supplement (doi:10.1039/d1gc00630d), 2021-01-01
Supplement: d1gc00630d1.pdf [file d1gc00630d1.pdf]

## Supporting Information

### **Silicon/graphite composite anode with constrained swelling and stable solid electrolyte interphase enabled by spent graphite**

Qi Xu,<sup>a</sup> Qianwen Wang,<sup>a</sup> Dequan Chen,<sup>a</sup> Yanjun Zhong,<sup>a</sup> Zhenguo Wu,<sup>\*a</sup> Yang Song,<sup>a</sup> Gongke Wang,<sup>b</sup> Yuxia Liu,<sup>c</sup> Benhe Zhong<sup>a</sup> and Xiaodong Guo<sup>a</sup>

<sup>a</sup>*School of Chemical Engineering, Sichuan University, Chengdu 610065, P. R. China*

<sup>b</sup>*School of Materials Science and Engineering, Henan Normal University, XinXiang 453007, P. R. China*

<sup>c</sup>*School of Chemistry and Chemical Engineering, Qufu Normal University, Qufu 273165, P. R. China.*

*\*Corresponding author:*

*E-mail address:* zhenguowu@scu.edu.cn

**Table S1** Crystal plane spacings of (002) peaks in AG and SG.

| Samples | $2\theta_{(002)}$ (°) | $d_{(002)}$ (nm) |
|---------|-----------------------|------------------|
| AG      | 26.288                | 0.3387           |
| SG      | 26.235                | 0.3394           |

**Table S2** Surface element distributions of AG and SG.

| Samples | C (%) | O (%) | Li (%) | F (%) | P (%) |
|---------|-------|-------|--------|-------|-------|
| AG      | 98.05 | 1.95  | /      | /     | /     |
| SG      | 94.72 | 3.33  | 1.49   | 0.33  | 0.14  |

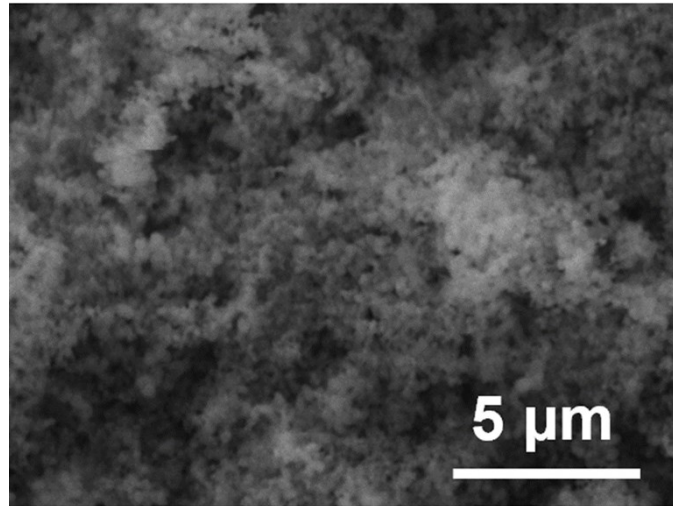

**Fig. S1** SEM image of Si nanoparticles.

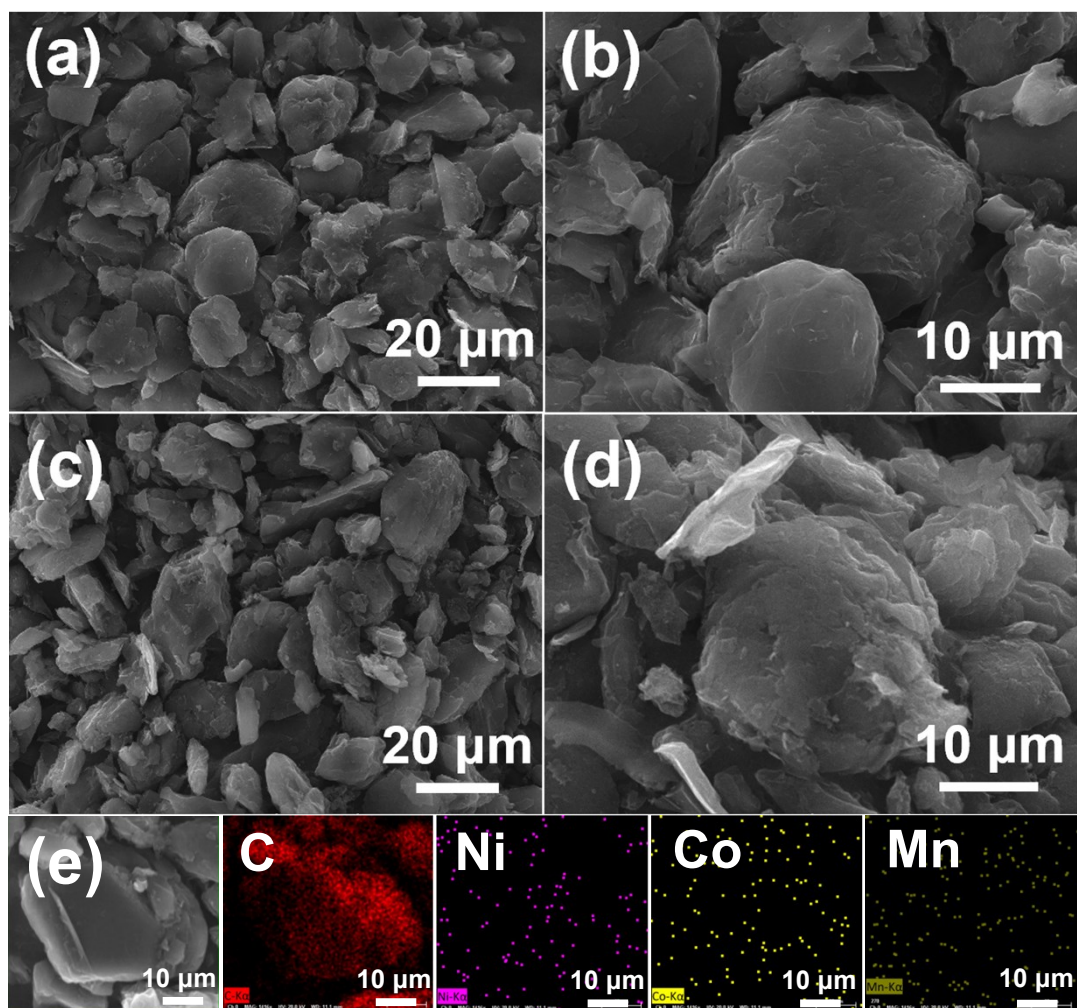

**Fig. S2** SEM images of (a-b) AG and (c-d) SG, (e) corresponding EDS mapping images of SG.

**Table S3** ICP-OES results of SG.

| Elements      | Li     | Ni     | Co    | Mn     | Al     | Cu     | Fe     |
|---------------|--------|--------|-------|--------|--------|--------|--------|
| Content (ppm) | 266.29 | 215.05 | 75.33 | 365.88 | 137.20 | 139.21 | 120.79 |

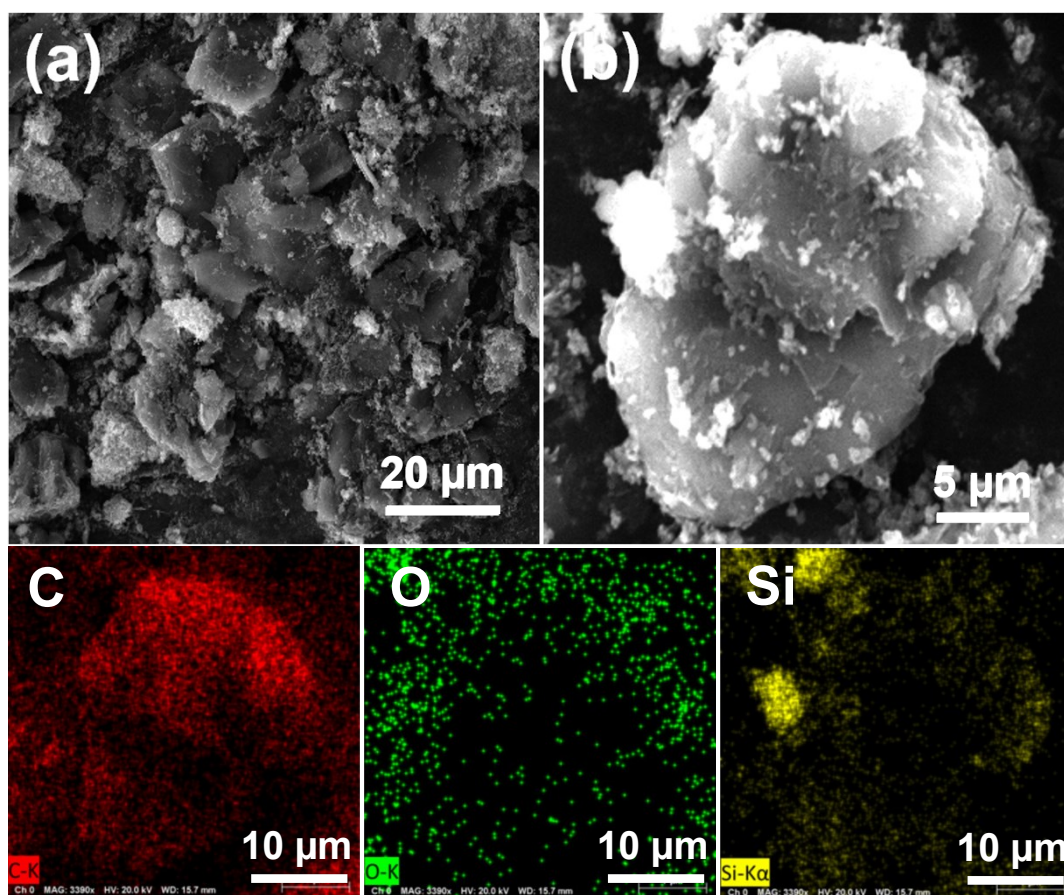

**Fig. S3** (a) SEM image and (b) corresponding EDS mapping images of Si/AG composite.

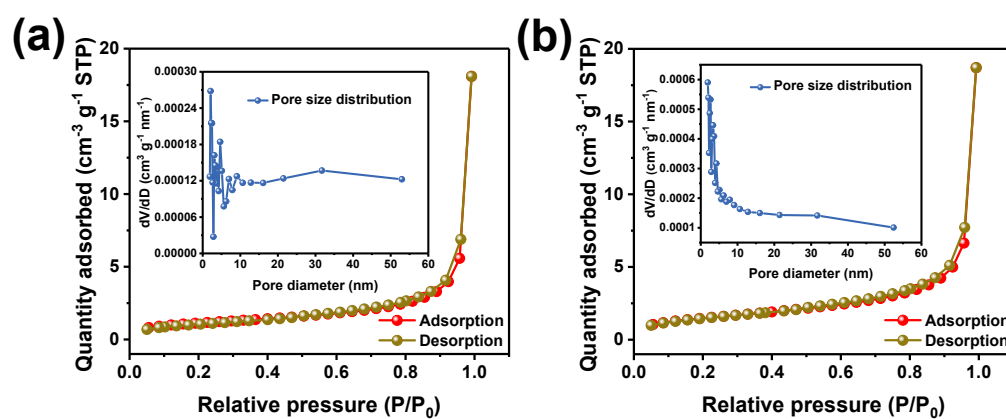

**Fig. S4** Nitrogen adsorption-desorption isotherms and corresponding pore size distributions of (a) Si/AG and (b) Si/SG composites.

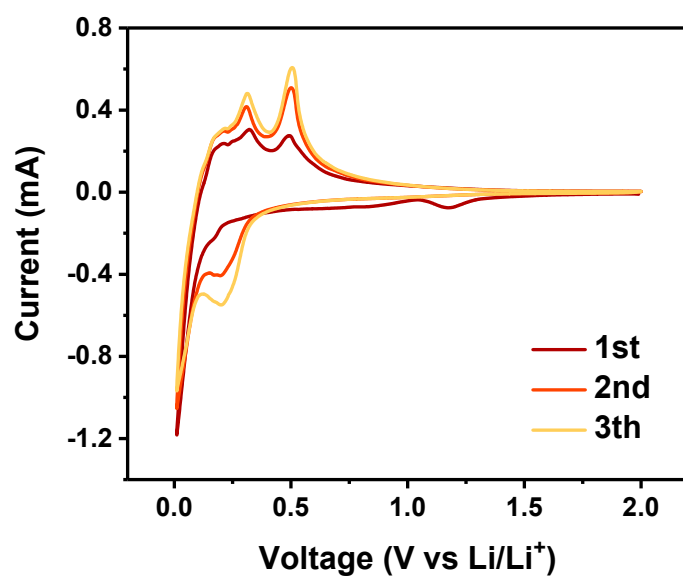

**Fig. S5** CV curves of Si/AG composite at a scan rate of  $0.1 \text{ mV s}^{-1}$  for the first three cycles.

**Table S4** Comparison of electrochemical performance with the other Si/graphite anodes in recent reported literatures.

| Anodes                             | Synthesis strategy          | Si content (wt%) | Mass loading (g cm <sup>-2</sup> ) | ICE (%) | Cycling stability (mAh g <sup>-1</sup> )        | Rate capacity (mAh g <sup>-1</sup> ) |
|------------------------------------|-----------------------------|------------------|------------------------------------|---------|-------------------------------------------------|--------------------------------------|
| Si <sub>FS</sub> /G@C <sub>1</sub> | Ball milling                | 25               | /                                  | 76.3    | 730 after 100 cycles at 0.1 A g <sup>-1</sup>   | ~680, 1 A g <sup>-1</sup>            |
| SiGC <sup>2</sup>                  | Ball milling + spray drying | 12.8             | 1.1                                | 80.5    | 610 after 300 cycles at 0.5 A g <sup>-1</sup>   | 458, 2 A g <sup>-1</sup>             |
| CSG <sup>3</sup>                   | CVD                         | 16.8             | 1.0-1.05                           | 80.5    | 530 after 100 cycles at 0.074 A g <sup>-1</sup> | 260, 1.86 A g <sup>-1</sup>          |
| Si/C-AG <sup>4</sup>               | Ball milling                | 21.5             | 1                                  | 64      | 334 after 500 cycles at 1 A g <sup>-1</sup>     | 350, 2 A g <sup>-1</sup>             |
| c-Gr + 15% Si <sup>5</sup>         | Calcination + etching       | 15.4             | 0.9-1.1                            | 74.2    | 485 after 400 cycles at 1 A g <sup>-1</sup>     | 770, 2 A g <sup>-1</sup>             |
| Nano-Si/G/C-2 <sup>6</sup>         | Ball milling                | 15.4             | 0.968                              | 83      | 368 after 500 cycles at 1 A g <sup>-1</sup>     | 200, 4 A g <sup>-1</sup>             |
| GSiWh <sup>7</sup>                 | Ball milling                | 33.3             | 1.4                                | 74      | 595 after 200 cycles at 2 A g <sup>-1</sup>     | 500, 0.5 A g <sup>-1</sup>           |
| Si/G@C <sup>8</sup>                | Ball milling                | 24.5             | 0.95                               | 83.7    | ~630 after 180 cycles at 0.2 A g <sup>-1</sup>  | 697, 1 A g <sup>-1</sup>             |
| MSC-2 <sup>9</sup>                 | Magnesiothermic reduction   | 21               | 2                                  | 81.3    | 648 after 105 cycles at 0.1 A g <sup>-1</sup>   | 218, 1.5 A g <sup>-1</sup>           |
| Si/G/C <sup>10</sup>               | Electrospray + ball milling | 21.8             | /                                  | 56.3    | 400 after 200 cycles at 0.5 A g <sup>-1</sup>   | 538, 2 A g <sup>-1</sup>             |
| <b>This work</b>                   | Ball milling                | 32.6             | 1.0-1.3                            | 76.4    | 562 after 400 cycles at 1 A g <sup>-1</sup>     | 646, 3 A g <sup>-1</sup>             |

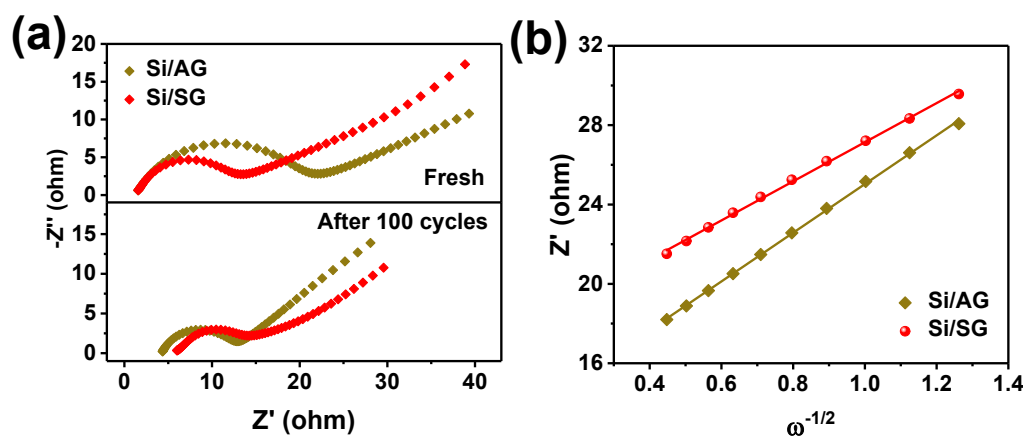

**Fig. S6** (a) Nyquist plots of Si/AG and Si/SG composite electrodes before and after 100 cycles and (b) corresponding linear fits (relationship between  $Z'$  and  $\omega^{-1/2}$ ) in the low-

frequency region after 100 cycles.

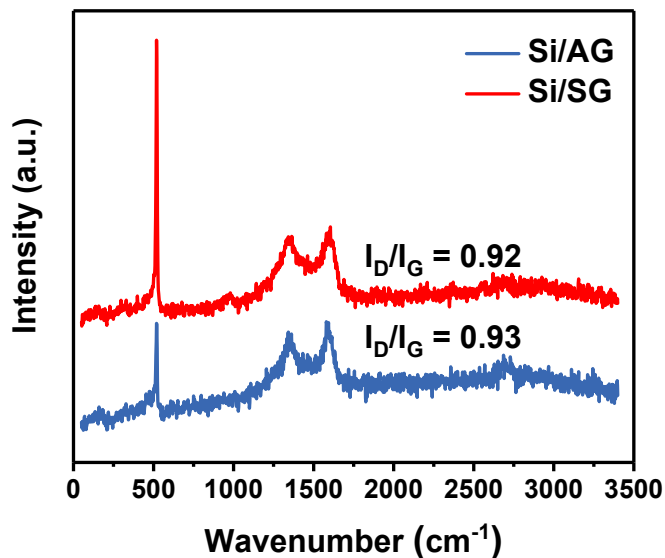

**Fig. S7** Raman spectra of cycled Si/AG and Si/SG composite electrodes.

**Table S5** Surface element distributions of Si/AG and Si/SG electrodes after 3 cycles.

| Samples | C (%) | O (%) | Li (%) | F (%) | Si (%) |
|---------|-------|-------|--------|-------|--------|
| Si/AG   | 47.53 | 29.61 | 19.1   | 2.85  | 0.89   |
| Si/SG   | 49.14 | 30.12 | 17.87  | 2.04  | 0.83   |

## References

- 1 L. Geng, D. Yang, S. Gao, Z. Zhang, F. Sun, Y. Pan, S. Li, X. Li, P.-F. Cao and H. Yang, *Adv. Mater. Interfaces*, 2020, **7**, 1901726.
- 2 D. Sui, Y. Xie, W. Zhao, H. Zhang, Y. Zhou, X. Qin, Y. Ma, Y. Yang and Y. Chen, *J. Power Sources*, 2018, **384**, 328-333.
- 3 B. Liu, P. Huang, Q. Zhang, Q. Huang and Z. Xie, *J Mater Sci*, 2020, **55**, 12165-12176.
- 4 W. Yang, H. Ying, S. Zhang, R. Guo, J. Wang and W.-Q. Han, *Electrochim. Acta*, 2020, **337**, 135687.
- 5 M. Chen, W. Cao, L. Wang, X. Ma and K. Han, *ACS Appl. Energy Mater.*, 2021, **4**,

775-783.

- 6 A. Sun, H. Zhong, X. Zhou, J. Tang, M. Jia, F. Cheng, Q. Wang and J. Yang, *Appl. Surf. Sci.*, 2019, **470**, 454-461.
- 7 M. H. Parekh, V. P. Parikh, P. J. Kim, S. Misra, Z. Qi, H. Wang and V. G. Pol, *Carbon*, 2019, **148**, 36-43.
- 8 T. Mu, Z. Zhang, Q. Li, S. Lou, P. Zuo, C. Du and G. Yin, *J. Colloid Interface Sci.*, 2019, **555**, 783-790.
- 9 P. Fan, T. Mu, S. Lou, X. Cheng, Y. Gao, C. Du, P. Zuo, Y. Ma and G. Yin, *Electrochim. Acta*, 2019, **306**, 590-598.
- 10 W. Liu, Y. Zhong, S. Yang, S. Zhang, X. Yu, H. Wang, Q. Li, J. Li, X. Cai and Y. Fang, *Sustain. Energy Fuels*, 2018, **2**, 679-687.
